# Supplementary material
Source: publisher site journal article supplement (https://www.dovepress.com/article/287641)
Supplement: Supplementary file 1 [file get_supplementary_file.php]

**Supplementary Table 1.** Multivariate analyses for prognostic factors of OS and RFS in the primary and recurrent groups.

|  | Primary HCC | | | | Recurrent HCC | | | |
| --- | --- | --- | --- | --- | --- | --- | --- | --- |
|  | OS | | RFS | | OS | | RFS | |
| Variables | HR (95% CI) | P | HR (95% CI) | P | HR (95% CI) | P | HR (95% CI) | P |
| ALBI grade | 0.24 (0.10-0.61) | 0.003 | 0.51 (0.29-0.92) | 0.024 |  |  |  |  |
| AFP, ng/mL | 0.32 (0.12-0.83) | 0.019 | 0.62 (0.40-0.95) | 0.027 | 0.44 (0.20-0.93) | 0.033 | 0.65 (0.44-0.97) | 0.034 |

**Supplementary Figure 1.**


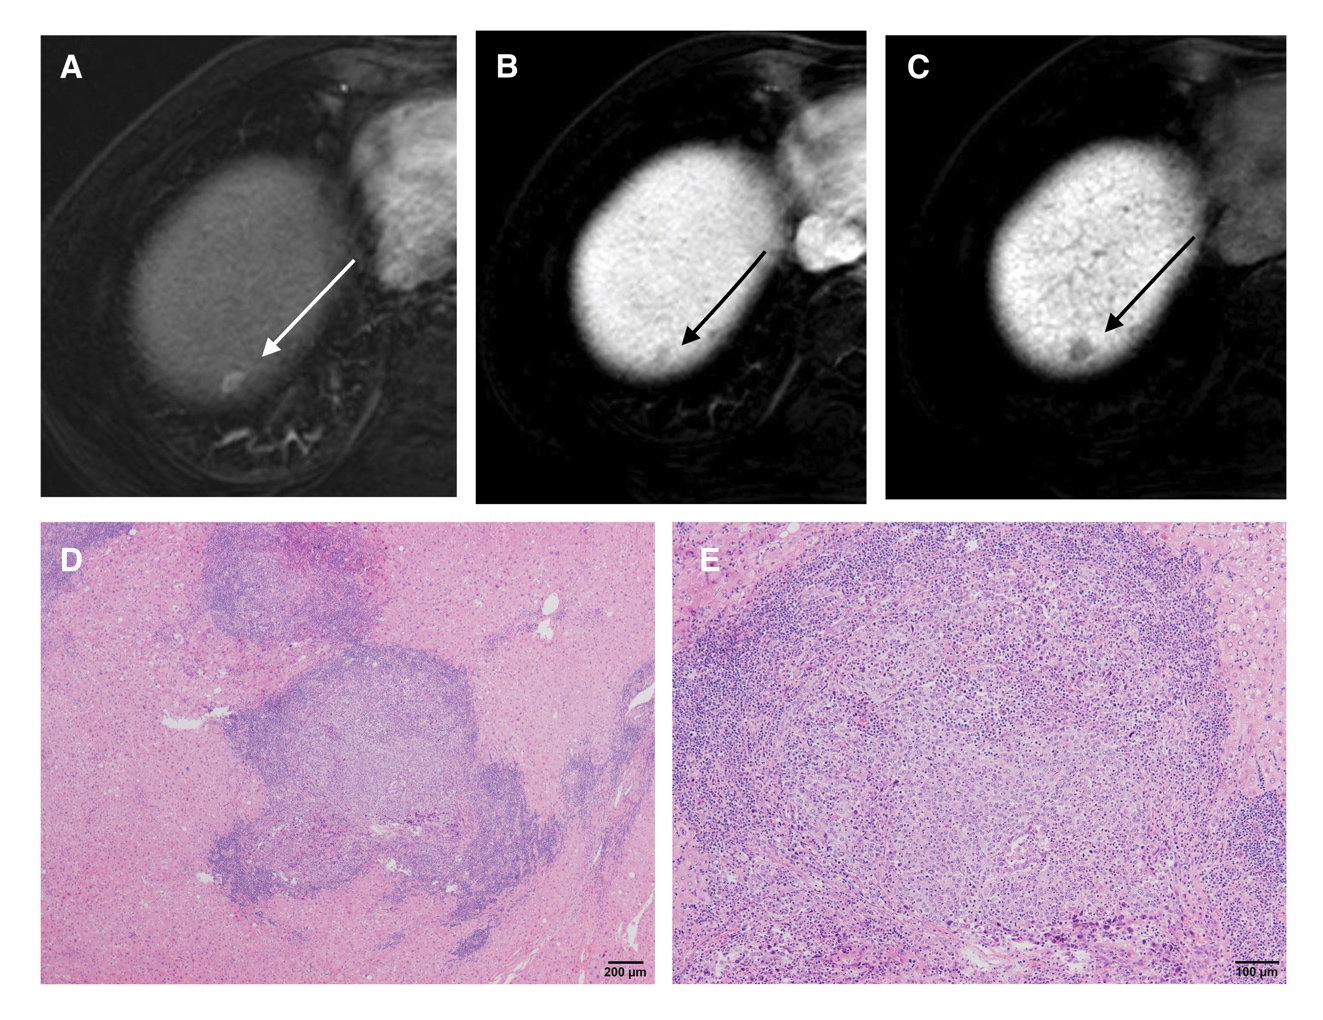


**Figure legends:** An 8.6-mm nodule in a 55-year-old man, which was confirmed to be moderate differentiation hepatocellular carcinoma by pathology. (A), arterial phase (B), delayed phase (C), hepatobiliary phase (D) (E), pathological imaging.

**Data of the primary group after propensity score matching.**

| ID | sex | age60 | HBV | ALBI | AFP25 | cirrhosis | treatment | size | recurrence | RFS | death | OS | group1 | distance | weights |
| --- | --- | --- | --- | --- | --- | --- | --- | --- | --- | --- | --- | --- | --- | --- | --- |
| 83047 | 1 | 1 | 1 | 1 | 1 | 1 | 1 | 2 | 0 | 66.73 | 0 | 66.73 | TRUE | 0.550471333 | 1 |
| 101854 | 1 | 1 | 1 | 1 | 1 | 0 | 1 | 2 | 0 | 53.63 | 0 | 60.1 | TRUE | 0.306911754 | 1 |
| 116860 | 1 | 0 | 1 | 1 | 1 | 1 | 2 | 2 | 0 | 3.33 | 0 | 3.33 | FALSE | 0.652624078 | 1 |
| 122974 | 1 | 0 | 1 | 1 | 0 | 1 | 2 | 2 | 0 | 58.57 | 0 | 58.57 | FALSE | 0.671104244 | 1 |
| 127479 | 1 | 1 | 1 | 2 | 1 | 0 | 2 | 2 | 1 | 4.07 | 1 | 46.53 | FALSE | 0.084326951 | 1 |
| 197671 | 1 | 0 | 1 | 1 | 0 | 1 | 1 | 2 | 1 | 18.07 | 1 | 23.1 | TRUE | 0.671104244 | 1 |
| 198800 | 1 | 0 | 1 | 1 | 1 | 0 | 2 | 2 | 0 | 122.2 | 0 | 125.73 | FALSE | 0.404541206 | 1 |
| 199993 | 2 | 0 | 0 | 2 | 1 | 1 | 2 | 2 | 0 | 1.13 | 0 | 1.17 | FALSE | 0.426782194 | 1 |
| 203686 | 1 | 1 | 0 | 2 | 1 | 1 | 1 | 2 | 0 | 0.43 | 1 | 0.4 | TRUE | 0.358487232 | 1 |
| 203957 | 1 | 0 | 0 | 2 | 1 | 1 | 2 | 2 | 1 | 4.73 | 0 | 4.73 | FALSE | 0.461596397 | 1 |
| 205676 | 1 | 1 | 1 | 1 | 1 | 1 | 1 | 2 | 1 | 77.77 | 1 | 90.63 | TRUE | 0.550471333 | 1 |
| 208811 | 1 | 1 | 0 | 1 | 0 | 1 | 2 | 2 | 0 | 1.53 | 1 | 1.53 | FALSE | 0.744789823 | 1 |
| 209732 | 1 | 1 | 1 | 1 | 0 | 0 | 1 | 2 | 1 | 8.13 | 1 | 15.1 | TRUE | 0.324754421 | 1 |
| 211427 | 1 | 0 | 1 | 1 | 0 | 0 | 1 | 2 | 0 | 0.17 | 0 | 0.17 | TRUE | 0.424582704 | 1 |
| 219621 | 2 | 0 | 1 | 1 | 1 | 0 | 1 | 2 | 0 | 76.07 | 0 | 76.3 | TRUE | 0.371064457 | 1 |
| 220382 | 1 | 0 | 1 | 1 | 0 | 0 | 2 | 2 | 1 | 4.37 | 0 | 35.27 | FALSE | 0.424582704 | 1 |
| 245006 | 1 | 0 | 1 | 2 | 0 | 1 | 1 | 2 | 0 | 7.3 | 0 | 7.3 | TRUE | 0.297929458 | 1 |
| 245331 | 1 | 1 | 1 | 1 | 0 | 1 | 1 | 2 | 0 | 1.4 | 1 | 1.4 | TRUE | 0.570812072 | 1 |
| 245783 | 1 | 0 | 1 | 2 | 1 | 1 | 1 | 2 | 1 | 3.7 | 0 | 10 | TRUE | 0.280947401 | 1 |
| 246081 | 2 | 0 | 1 | 1 | 1 | 0 | 2 | 2 | 0 | 83.9 | 0 | 89.93 | FALSE | 0.371064457 | 1 |
| 246175 | 1 | 0 | 1 | 1 | 0 | 1 | 1 | 2 | 1 | 42.6 | 0 | 81.97 | TRUE | 0.671104244 | 1 |
| 246615 | 2 | 1 | 1 | 1 | 1 | 1 | 1 | 2 | 1 | 11.9 | 0 | 63.77 | TRUE | 0.51537037 | 1 |
| 248409 | 1 | 1 | 1 | 1 | 1 | 0 | 2 | 1 | 0 | 41.13 | 0 | 41.13 | FALSE | 0.561722805 | 1 |
| 248617 | 1 | 1 | 1 | 1 | 1 | 1 | 1 | 2 | 1 | 17.4 | 1 | 17.4 | TRUE | 0.550471333 | 1 |
| 251377 | 2 | 0 | 1 | 1 | 1 | 0 | 1 | 1 | 1 | 6.33 | 1 | 20.1 | TRUE | 0.630672052 | 1 |
| 253102 | 1 | 1 | 1 | 1 | 0 | 1 | 1 | 2 | 0 | 86.6 | 0 | 86.6 | TRUE | 0.570812072 | 1 |
| 253358 | 1 | 0 | 1 | 1 | 0 | 0 | 1 | 2 | 0 | 86.47 | 0 | 86.47 | TRUE | 0.424582704 | 1 |
| 254590 | 2 | 1 | 1 | 1 | 1 | 1 | 1 | 2 | 1 | 11.57 | 1 | 19.77 | TRUE | 0.51537037 | 1 |
| 255290 | 1 | 1 | 0 | 1 | 1 | 1 | 1 | 2 | 0 | 1.4 | 0 | 1.4 | TRUE | 0.728776666 | 1 |
| 255687 | 1 | 0 | 1 | 1 | 0 | 0 | 1 | 2 | 0 | 1.5 | 0 | 1.5 | TRUE | 0.424582704 | 1 |
| 256159 | 1 | 1 | 1 | 1 | 1 | 0 | 2 | 2 | 1 | 55.9 | 0 | 73.4 | FALSE | 0.306911754 | 1 |
| 256757 | 1 | 1 | 1 | 1 | 1 | 1 | 2 | 2 | 0 | 10.93 | 0 | 10.93 | FALSE | 0.550471333 | 1 |
| 257080 | 1 | 0 | 1 | 1 | 0 | 0 | 2 | 2 | 0 | 27.27 | 0 | 27.27 | FALSE | 0.424582704 | 1 |
| 260731 | 1 | 0 | 1 | 1 | 0 | 0 | 1 | 2 | 0 | 80.57 | 0 | 80.57 | TRUE | 0.424582704 | 1 |
| 261727 | 1 | 1 | 1 | 1 | 1 | 1 | 2 | 2 | 1 | 26.3 | 0 | 38.7 | FALSE | 0.550471333 | 1 |
| 267033 | 2 | 1 | 0 | 1 | 1 | 0 | 2 | 2 | 0 | 0.07 | 0 | 0.07 | FALSE | 0.457646242 | 1 |
| 267216 | 1 | 1 | 0 | 2 | 1 | 1 | 2 | 2 | 1 | 10.83 | 1 | 11.3 | FALSE | 0.358487232 | 1 |
| 267816 | 2 | 1 | 0 | 1 | 0 | 0 | 2 | 2 | 0 | 17.97 | 0 | 17.97 | FALSE | 0.478205795 | 1 |
| 270582 | 1 | 0 | 1 | 2 | 1 | 0 | 1 | 2 | 0 | 1.57 | 1 | 1.57 | TRUE | 0.12379866 | 1 |
| 271040 | 1 | 0 | 1 | 1 | 0 | 1 | 1 | 2 | 0 | 3.83 | 0 | 7.47 | TRUE | 0.671104244 | 1 |
| 271236 | 1 | 0 | 1 | 1 | 0 | 0 | 2 | 2 | 0 | 42.83 | 0 | 69.67 | FALSE | 0.424582704 | 1 |
| 272502 | 2 | 1 | 1 | 2 | 0 | 0 | 1 | 2 | 0 | 0.17 | 0 | 0.17 | TRUE | 0.079919422 | 1 |
| 274007 | 1 | 1 | 1 | 1 | 1 | 1 | 2 | 2 | 0 | 72.73 | 0 | 72.73 | FALSE | 0.550471333 | 1 |
| 275280 | 1 | 0 | 1 | 2 | 1 | 0 | 2 | 2 | 0 | 59.4 | 0 | 68 | FALSE | 0.12379866 | 1 |
| 275501 | 1 | 1 | 1 | 1 | 0 | 1 | 2 | 2 | 0 | 1.1 | 0 | 1.1 | FALSE | 0.570812072 | 1 |
| 275567 | 1 | 1 | 0 | 1 | 1 | 1 | 2 | 2 | 1 | 6.67 | 0 | 35.87 | FALSE | 0.728776666 | 1 |
| 275571 | 1 | 0 | 1 | 1 | 1 | 0 | 2 | 2 | 1 | 7.1 | 0 | 10.07 | FALSE | 0.404541206 | 1 |
| 278023 | 2 | 1 | 0 | 1 | 0 | 0 | 1 | 2 | 0 | 1.4 | 0 | 1.4 | TRUE | 0.478205795 | 1 |
| 279286 | 1 | 0 | 1 | 1 | 1 | 0 | 1 | 2 | 0 | 60.1 | 0 | 60.1 | TRUE | 0.404541206 | 1 |
| 279414 | 1 | 0 | 1 | 1 | 1 | 0 | 1 | 2 | 0 | 56.7 | 0 | 56.7 | TRUE | 0.404541206 | 1 |
| 279678 | 1 | 0 | 1 | 1 | 1 | 0 | 1 | 2 | 0 | 62.6 | 0 | 66.23 | TRUE | 0.404541206 | 1 |
| 281976 | 1 | 0 | 1 | 1 | 0 | 1 | 1 | 2 | 0 | 50.73 | 0 | 50.73 | TRUE | 0.671104244 | 1 |
| 283534 | 1 | 0 | 1 | 1 | 0 | 1 | 2 | 2 | 1 | 8.87 | 0 | 51.93 | FALSE | 0.671104244 | 1 |
| 284373 | 1 | 0 | 1 | 1 | 0 | 1 | 1 | 2 | 0 | 54.6 | 0 | 54.6 | TRUE | 0.671104244 | 1 |
| 285784 | 2 | 0 | 1 | 2 | 1 | 1 | 1 | 2 | 0 | 1.3 | 0 | 1.5 | TRUE | 0.253346815 | 1 |
| 286086 | 1 | 0 | 1 | 1 | 0 | 0 | 2 | 2 | 0 | 68.47 | 0 | 68.47 | FALSE | 0.424582704 | 1 |
| 286132 | 1 | 0 | 1 | 1 | 0 | 1 | 1 | 2 | 1 | 4.57 | 0 | 26.37 | TRUE | 0.671104244 | 1 |
| 286865 | 2 | 0 | 1 | 1 | 0 | 1 | 2 | 2 | 1 | 12 | 0 | 64.77 | FALSE | 0.639249727 | 1 |
| 288926 | 1 | 0 | 1 | 1 | 0 | 1 | 1 | 2 | 0 | 54.37 | 0 | 54.37 | TRUE | 0.671104244 | 1 |
| 291704 | 1 | 0 | 1 | 1 | 0 | 1 | 1 | 2 | 1 | 33.23 | 0 | 58.53 | TRUE | 0.671104244 | 1 |
| 292751 | 1 | 1 | 1 | 1 | 0 | 1 | 1 | 2 | 1 | 20.23 | 0 | 45.17 | TRUE | 0.570812072 | 1 |
| 294259 | 1 | 1 | 1 | 1 | 1 | 1 | 1 | 2 | 0 | 63.4 | 0 | 63.4 | TRUE | 0.550471333 | 1 |
| 295512 | 1 | 1 | 1 | 1 | 0 | 1 | 2 | 2 | 0 | 7.2 | 0 | 7.2 | FALSE | 0.570812072 | 1 |
| 297516 | 1 | 0 | 1 | 1 | 1 | 1 | 1 | 2 | 0 | 4.37 | 0 | 4.37 | TRUE | 0.652624078 | 1 |
| 299980 | 1 | 0 | 0 | 2 | 0 | 1 | 1 | 2 | 1 | 14.97 | 1 | 24.93 | TRUE | 0.48217564 | 1 |
| 303051 | 1 | 1 | 1 | 1 | 1 | 0 | 1 | 2 | 1 | 8.43 | 0 | 58.8 | TRUE | 0.306911754 | 1 |
| 304474 | 2 | 1 | 1 | 1 | 1 | 1 | 1 | 2 | 0 | 19.9 | 0 | 19.9 | TRUE | 0.51537037 | 1 |
| 305292 | 2 | 1 | 1 | 1 | 0 | 1 | 2 | 2 | 1 | 52.27 | 0 | 58.57 | FALSE | 0.535960492 | 1 |
| 305400 | 2 | 1 | 0 | 1 | 0 | 1 | 1 | 2 | 0 | 11.1 | 0 | 11.1 | TRUE | 0.71706316 | 1 |
| 305642 | 1 | 0 | 1 | 1 | 0 | 1 | 1 | 2 | 0 | 4.1 | 0 | 4.1 | TRUE | 0.671104244 | 1 |
| 306618 | 1 | 0 | 1 | 1 | 0 | 1 | 2 | 2 | 0 | 10.67 | 0 | 10.67 | FALSE | 0.671104244 | 1 |
| 306708 | 1 | 0 | 1 | 1 | 0 | 1 | 1 | 2 | 0 | 1.4 | 0 | 1.4 | TRUE | 0.671104244 | 1 |
| 310795 | 1 | 1 | 1 | 1 | 0 | 0 | 2 | 2 | 1 | 3.73 | 0 | 54.47 | FALSE | 0.324754421 | 1 |
| 311987 | 1 | 0 | 1 | 1 | 0 | 1 | 2 | 2 | 0 | 42.27 | 0 | 42.27 | FALSE | 0.671104244 | 1 |
| 312468 | 1 | 1 | 1 | 1 | 0 | 0 | 2 | 2 | 0 | 1.1 | 0 | 1.1 | FALSE | 0.324754421 | 1 |
| 312670 | 1 | 0 | 1 | 1 | 1 | 1 | 1 | 2 | 0 | 1.1 | 0 | 1.1 | TRUE | 0.652624078 | 1 |
| 315027 | 2 | 1 | 1 | 1 | 1 | 1 | 2 | 2 | 0 | 1.57 | 0 | 1.63 | FALSE | 0.51537037 | 1 |
| 315591 | 1 | 0 | 1 | 1 | 1 | 1 | 2 | 2 | 1 | 11.43 | 0 | 46.2 | FALSE | 0.652624078 | 1 |
| 316516 | 1 | 0 | 1 | 1 | 0 | 1 | 1 | 2 | 0 | 51.5 | 0 | 51.5 | TRUE | 0.671104244 | 1 |
| 316553 | 2 | 1 | 0 | 1 | 1 | 1 | 2 | 2 | 1 | 8.73 | 0 | 29.07 | FALSE | 0.70001102 | 1 |
| 317308 | 1 | 0 | 1 | 1 | 0 | 0 | 2 | 2 | 0 | 2.73 | 0 | 2.73 | FALSE | 0.424582704 | 1 |
| 323180 | 1 | 0 | 1 | 1 | 0 | 1 | 1 | 2 | 0 | 8.33 | 0 | 8.33 | TRUE | 0.671104244 | 1 |
| 323848 | 1 | 1 | 1 | 1 | 0 | 1 | 1 | 2 | 0 | 17.33 | 0 | 17.33 | TRUE | 0.570812072 | 1 |
| 328009 | 1 | 0 | 1 | 1 | 0 | 0 | 1 | 2 | 0 | 17.6 | 0 | 17.6 | TRUE | 0.424582704 | 1 |
| 328802 | 2 | 0 | 0 | 1 | 0 | 1 | 2 | 2 | 1 | 36.3 | 0 | 41 | FALSE | 0.795427735 | 1 |
| 329342 | 1 | 1 | 1 | 1 | 0 | 0 | 1 | 2 | 0 | 49.27 | 0 | 49.27 | TRUE | 0.324754421 | 1 |
| 329783 | 1 | 0 | 1 | 1 | 0 | 1 | 2 | 2 | 1 | 8.63 | 1 | 27.47 | FALSE | 0.671104244 | 1 |
| 332193 | 1 | 0 | 0 | 1 | 0 | 1 | 2 | 2 | 1 | 46.97 | 0 | 48.53 | FALSE | 0.817430224 | 1 |
| 337908 | 1 | 0 | 1 | 1 | 0 | 1 | 1 | 2 | 1 | 24.87 | 0 | 24.87 | TRUE | 0.671104244 | 1 |
| 338477 | 2 | 0 | 1 | 1 | 1 | 0 | 1 | 2 | 1 | 31.9 | 0 | 45.63 | TRUE | 0.371064457 | 1 |
| 345041 | 2 | 0 | 1 | 2 | 0 | 1 | 1 | 2 | 0 | 39.9 | 0 | 39.9 | TRUE | 0.269285328 | 1 |
| 346820 | 1 | 0 | 0 | 1 | 0 | 1 | 1 | 2 | 1 | 23.07 | 0 | 24.83 | TRUE | 0.817430224 | 1 |
| 347791 | 1 | 0 | 1 | 1 | 1 | 0 | 2 | 2 | 1 | 18.37 | 0 | 41.67 | FALSE | 0.404541206 | 1 |
| 350047 | 1 | 1 | 1 | 1 | 0 | 1 | 2 | 2 | 0 | 38.47 | 0 | 38.47 | FALSE | 0.570812072 | 1 |
| 351242 | 1 | 0 | 1 | 1 | 0 | 1 | 2 | 2 | 0 | 37.47 | 0 | 37.47 | FALSE | 0.671104244 | 1 |
| 355182 | 2 | 0 | 1 | 1 | 1 | 1 | 2 | 2 | 1 | 12.7 | 0 | 26.23 | FALSE | 0.619993194 | 1 |
| 356155 | 2 | 1 | 0 | 1 | 1 | 0 | 1 | 2 | 0 | 4 | 0 | 4 | TRUE | 0.457646242 | 1 |
| 361707 | 2 | 1 | 1 | 1 | 1 | 0 | 2 | 2 | 0 | 1.27 | 0 | 1.27 | FALSE | 0.277745675 | 1 |
| 362126 | 1 | 0 | 1 | 1 | 0 | 0 | 1 | 2 | 0 | 34.97 | 0 | 34.97 | TRUE | 0.424582704 | 1 |
| 364283 | 2 | 0 | 1 | 1 | 0 | 1 | 2 | 2 | 0 | 34.73 | 0 | 34.73 | FALSE | 0.639249727 | 1 |
| 366051 | 1 | 0 | 1 | 1 | 0 | 1 | 1 | 2 | 0 | 1.67 | 0 | 1.67 | TRUE | 0.671104244 | 1 |
| 366319 | 1 | 0 | 1 | 1 | 0 | 1 | 1 | 2 | 0 | 35.9 | 0 | 35.9 | TRUE | 0.671104244 | 1 |
| 366880 | 2 | 0 | 0 | 1 | 0 | 0 | 1 | 1 | 0 | 29.53 | 0 | 29.53 | TRUE | 0.802745092 | 1 |
| 367413 | 1 | 0 | 1 | 1 | 0 | 0 | 1 | 1 | 0 | 13.43 | 0 | 13.43 | TRUE | 0.681085607 | 1 |
| 368417 | 1 | 0 | 1 | 1 | 0 | 1 | 2 | 2 | 0 | 1.33 | 0 | 1.33 | FALSE | 0.671104244 | 1 |
| 370128 | 2 | 0 | 1 | 2 | 0 | 1 | 2 | 2 | 0 | 16.93 | 0 | 16.93 | FALSE | 0.269285328 | 1 |
| 370966 | 2 | 0 | 0 | 1 | 1 | 0 | 1 | 2 | 0 | 5 | 0 | 5 | TRUE | 0.564192897 | 1 |
| 372551 | 1 | 1 | 0 | 1 | 0 | 0 | 2 | 2 | 0 | 27.03 | 0 | 27.03 | FALSE | 0.513457325 | 1 |
| 376791 | 1 | 0 | 1 | 1 | 0 | 0 | 2 | 2 | 1 | 9.27 | 0 | 32.93 | FALSE | 0.424582704 | 1 |
| 377780 | 1 | 0 | 1 | 1 | 1 | 1 | 2 | 1 | 1 | 6 | 1 | 7.97 | FALSE | 0.844663912 | 1 |
| 377877 | 2 | 0 | 1 | 1 | 1 | 0 | 2 | 2 | 1 | 10.47 | 0 | 29.5 | FALSE | 0.371064457 | 1 |
| 378985 | 1 | 1 | 1 | 1 | 0 | 1 | 1 | 2 | 1 | 29.13 | 0 | 30.63 | TRUE | 0.570812072 | 1 |
| 380013 | 1 | 0 | 1 | 1 | 0 | 1 | 2 | 2 | 1 | 5.83 | 0 | 29.43 | FALSE | 0.671104244 | 1 |
| 381520 | 1 | 1 | 1 | 1 | 1 | 0 | 2 | 2 | 1 | 6.53 | 0 | 31.53 | FALSE | 0.306911754 | 1 |
| 384076 | 1 | 0 | 1 | 1 | 1 | 0 | 2 | 2 | 0 | 1.13 | 0 | 1.13 | FALSE | 0.404541206 | 1 |
| 384562 | 1 | 0 | 1 | 1 | 1 | 0 | 2 | 2 | 1 | 15.63 | 0 | 29.33 | FALSE | 0.404541206 | 1 |
| 385182 | 1 | 0 | 1 | 1 | 0 | 1 | 2 | 2 | 1 | 1.4 | 0 | 29.6 | FALSE | 0.671104244 | 1 |
| 386614 | 1 | 0 | 1 | 1 | 0 | 0 | 1 | 2 | 0 | 21.53 | 0 | 21.53 | TRUE | 0.424582704 | 1 |
| 388432 | 2 | 1 | 1 | 1 | 0 | 0 | 2 | 2 | 0 | 25.4 | 0 | 25.4 | FALSE | 0.294613495 | 1 |
| 389722 | 1 | 0 | 1 | 1 | 1 | 1 | 2 | 2 | 0 | 5.47 | 0 | 5.47 | FALSE | 0.652624078 | 1 |
| 391766 | 1 | 0 | 1 | 2 | 0 | 1 | 2 | 2 | 1 | 1.2 | 0 | 10.2 | FALSE | 0.297929458 | 1 |
| 393270 | 1 | 1 | 1 | 2 | 1 | 1 | 1 | 2 | 0 | 6.07 | 0 | 6.07 | TRUE | 0.202977864 | 1 |
| 395409 | 1 | 1 | 1 | 1 | 0 | 0 | 2 | 2 | 0 | 1 | 0 | 1 | FALSE | 0.324754421 | 1 |
| 397032 | 1 | 0 | 1 | 1 | 1 | 1 | 2 | 2 | 0 | 24.63 | 0 | 24.63 | FALSE | 0.652624078 | 1 |
| 400483 | 2 | 1 | 1 | 1 | 1 | 1 | 2 | 2 | 0 | 17.3 | 0 | 11.47 | FALSE | 0.51537037 | 1 |
| 400698 | 1 | 0 | 1 | 1 | 1 | 0 | 1 | 2 | 0 | 10.17 | 0 | 10.17 | TRUE | 0.404541206 | 1 |
| 402498 | 1 | 0 | 1 | 1 | 0 | 0 | 2 | 2 | 0 | 21.07 | 0 | 21.07 | FALSE | 0.424582704 | 1 |
| 402952 | 1 | 0 | 1 | 1 | 0 | 0 | 1 | 2 | 0 | 2 | 0 | 2 | TRUE | 0.424582704 | 1 |
| 403993 | 1 | 0 | 1 | 1 | 0 | 1 | 2 | 2 | 0 | 16.1 | 0 | 16.1 | FALSE | 0.671104244 | 1 |
| 409426 | 1 | 0 | 1 | 1 | 1 | 1 | 2 | 2 | 1 | 1.1 | 0 | 16.57 | FALSE | 0.652624078 | 1 |
| 410761 | 1 | 1 | 1 | 1 | 0 | 0 | 1 | 2 | 0 | 19.73 | 0 | 19.73 | TRUE | 0.324754421 | 1 |
| 411591 | 1 | 0 | 1 | 1 | 0 | 1 | 2 | 2 | 0 | 17.7 | 0 | 17.7 | FALSE | 0.671104244 | 1 |
| 411790 | 1 | 0 | 1 | 1 | 1 | 1 | 2 | 2 | 1 | 3.27 | 0 | 12.13 | FALSE | 0.652624078 | 1 |
| 412577 | 1 | 1 | 1 | 2 | 0 | 1 | 2 | 2 | 0 | 13.23 | 0 | 13.23 | FALSE | 0.216667111 | 1 |
| 412622 | 1 | 1 | 1 | 1 | 0 | 1 | 2 | 2 | 0 | 16.27 | 0 | 17.03 | FALSE | 0.570812072 | 1 |
| 413755 | 1 | 0 | 1 | 1 | 0 | 0 | 1 | 1 | 1 | 1.83 | 0 | 11 | TRUE | 0.681085607 | 1 |
| 414241 | 1 | 1 | 0 | 1 | 1 | 1 | 1 | 2 | 0 | 1.77 | 0 | 1.77 | TRUE | 0.728776666 | 1 |
| 414892 | 1 | 0 | 1 | 1 | 1 | 1 | 2 | 2 | 0 | 18.13 | 0 | 18.13 | FALSE | 0.652624078 | 1 |
| 414930 | 1 | 0 | 0 | 1 | 0 | 0 | 2 | 1 | 0 | 11.87 | 0 | 11.87 | FALSE | 0.824134577 | 1 |
| 418941 | 1 | 0 | 1 | 2 | 1 | 1 | 2 | 2 | 0 | 1.13 | 0 | 1.13 | FALSE | 0.280947401 | 1 |
| 419358 | 1 | 1 | 1 | 1 | 1 | 0 | 1 | 2 | 1 | 8.1 | 0 | 17.67 | TRUE | 0.306911754 | 1 |
| 421395 | 1 | 0 | 1 | 1 | 1 | 0 | 1 | 2 | 0 | 17.17 | 0 | 17.17 | TRUE | 0.404541206 | 1 |
| 422701 | 1 | 0 | 1 | 1 | 0 | 1 | 1 | 1 | 0 | 16.57 | 0 | 13.27 | TRUE | 0.85519452 | 1 |
| 423119 | 1 | 1 | 1 | 1 | 0 | 0 | 2 | 2 | 1 | 13 | 0 | 16.27 | FALSE | 0.324754421 | 1 |
| 428935 | 2 | 1 | 1 | 1 | 0 | 1 | 2 | 2 | 0 | 1.1 | 0 | 1.1 | FALSE | 0.535960492 | 1 |
| 429550 | 1 | 1 | 1 | 1 | 1 | 0 | 1 | 2 | 0 | 12.83 | 0 | 12.83 | TRUE | 0.306911754 | 1 |
| 431380 | 1 | 0 | 1 | 1 | 0 | 1 | 1 | 2 | 0 | 7.03 | 0 | 7.03 | TRUE | 0.671104244 | 1 |
| 434870 | 1 | 0 | 0 | 1 | 0 | 1 | 1 | 2 | 0 | 1.27 | 0 | 1.27 | TRUE | 0.817430224 | 1 |

**Data of the recurrent group after propensity score matching.**

| ID | sex | age60 | HBV | ALBI | AFP25 | cirrhosis | treatment | size | recurrence | RFS | death | OS | group1 | distance | weights |
| --- | --- | --- | --- | --- | --- | --- | --- | --- | --- | --- | --- | --- | --- | --- | --- |
| 106853 | 2 | 0 | 1 | 1 | 0 | 0 | 2 | 2 | 1 | 4.13 | 1 | 38.93 | FALSE | 0.563767232 | 1 |
| 108991 | 1 | 1 | 1 | 1 | 0 | 0 | 1 | 2 | 1 | 10.23 | 1 | 56.9 | TRUE | 0.23604911 | 1 |
| 118326 | 1 | 0 | 1 | 1 | 0 | 1 | 1 | 2 | 0 | 47.93 | 0 | 47.93 | TRUE | 0.31893044 | 1 |
| 124967 | 1 | 1 | 1 | 1 | 0 | 1 | 1 | 2 | 0 | 9.23 | 1 | 9.17 | TRUE | 0.23246128 | 1 |
| 168882 | 1 | 1 | 1 | 1 | 0 | 1 | 2 | 2 | 1 | 41.73 | 0 | 72.47 | FALSE | 0.23246128 | 1 |
| 178289 | 1 | 0 | 1 | 1 | 0 | 1 | 1 | 2 | 1 | 5.3 | 1 | 11.47 | TRUE | 0.31893044 | 1 |
| 178845 | 1 | 1 | 1 | 1 | 0 | 0 | 1 | 2 | 1 | 4.73 | 0 | 46.33 | TRUE | 0.23604911 | 1 |
| 179204 | 2 | 1 | 1 | 1 | 0 | 0 | 1 | 2 | 1 | 17.37 | 0 | 129.03 | TRUE | 0.455292634 | 1 |
| 189693 | 1 | 1 | 1 | 1 | 0 | 0 | 1 | 2 | 0 | 46.87 | 0 | 46.87 | TRUE | 0.23604911 | 1 |
| 191597 | 1 | 0 | 0 | 1 | 1 | 0 | 1 | 2 | 1 | 77.53 | 0 | 77.53 | TRUE | 0.240141071 | 1 |
| 194921 | 1 | 0 | 0 | 1 | 0 | 0 | 1 | 2 | 0 | 67.2 | 0 | 67.2 | TRUE | 0.277044451 | 1 |
| 195912 | 1 | 0 | 1 | 1 | 0 | 0 | 1 | 2 | 0 | 27.9 | 0 | 27.9 | TRUE | 0.323290714 | 1 |
| 198254 | 1 | 1 | 1 | 2 | 0 | 1 | 2 | 2 | 1 | 89.33 | 0 | 90.9 | FALSE | 0.135761465 | 1 |
| 199980 | 2 | 1 | 1 | 1 | 0 | 0 | 2 | 2 | 1 | 7.2 | 0 | 62.1 | FALSE | 0.455292634 | 1 |
| 214425 | 1 | 0 | 1 | 1 | 1 | 0 | 1 | 1 | 1 | 6.47 | 1 | 12 | TRUE | 0.268953149 | 1 |
| 215073 | 1 | 1 | 1 | 1 | 1 | 0 | 1 | 1 | 0 | 3.07 | 1 | 3.07 | TRUE | 0.19220991 | 1 |
| 217698 | 1 | 1 | 1 | 1 | 1 | 1 | 1 | 2 | 0 | 26.07 | 0 | 26.07 | TRUE | 0.199854861 | 1 |
| 218690 | 1 | 0 | 1 | 1 | 0 | 0 | 1 | 2 | 0 | 50.07 | 0 | 50.07 | TRUE | 0.323290714 | 1 |
| 219671 | 1 | 0 | 1 | 1 | 0 | 1 | 1 | 2 | 1 | 43.67 | 0 | 98.87 | TRUE | 0.31893044 | 1 |
| 222643 | 1 | 0 | 1 | 1 | 1 | 0 | 2 | 2 | 1 | 1.23 | 0 | 3.7 | FALSE | 0.282635443 | 1 |
| 226772 | 1 | 0 | 1 | 1 | 0 | 1 | 1 | 2 | 0 | 58.13 | 0 | 58.13 | TRUE | 0.31893044 | 1 |
| 228611 | 1 | 0 | 1 | 1 | 0 | 1 | 2 | 2 | 0 | 3.47 | 0 | 3.47 | FALSE | 0.31893044 | 1 |
| 236291 | 1 | 0 | 1 | 1 | 1 | 1 | 1 | 2 | 0 | 40.33 | 0 | 40.33 | TRUE | 0.27859775 | 1 |
| 237634 | 2 | 1 | 1 | 1 | 0 | 1 | 2 | 2 | 0 | 67.07 | 0 | 67.07 | FALSE | 0.450336804 | 1 |
| 237847 | 1 | 0 | 1 | 1 | 1 | 0 | 1 | 2 | 0 | 30.9 | 0 | 30.9 | TRUE | 0.282635443 | 1 |
| 243977 | 1 | 0 | 1 | 1 | 0 | 0 | 1 | 2 | 0 | 51.1 | 0 | 51.1 | TRUE | 0.323290714 | 1 |
| 246615 | 2 | 1 | 1 | 2 | 0 | 1 | 2 | 2 | 0 | 39.27 | 0 | 51.13 | FALSE | 0.298218825 | 1 |
| 247381 | 1 | 0 | 1 | 1 | 0 | 0 | 1 | 2 | 1 | 19.17 | 0 | 24.17 | TRUE | 0.323290714 | 1 |
| 248378 | 2 | 0 | 1 | 1 | 1 | 0 | 1 | 2 | 1 | 34.67 | 0 | 53.63 | TRUE | 0.515926862 | 1 |
| 250346 | 1 | 0 | 1 | 1 | 0 | 1 | 1 | 2 | 0 | 61.3 | 0 | 61.3 | TRUE | 0.31893044 | 1 |
| 251329 | 1 | 0 | 1 | 1 | 0 | 1 | 1 | 2 | 1 | 53.5 | 0 | 55.37 | TRUE | 0.31893044 | 1 |
| 253432 | 1 | 0 | 1 | 1 | 0 | 1 | 2 | 1 | 1 | 9.8 | 0 | 40.53 | FALSE | 0.304236278 | 1 |
| 254677 | 1 | 1 | 1 | 1 | 0 | 1 | 2 | 1 | 1 | 12.9 | 0 | 43.7 | FALSE | 0.220461445 | 1 |
| 254712 | 1 | 0 | 1 | 1 | 1 | 1 | 1 | 2 | 1 | 30.87 | 1 | 56.3 | TRUE | 0.27859775 | 1 |
| 255097 | 1 | 0 | 1 | 1 | 0 | 0 | 2 | 2 | 0 | 21.17 | 0 | 21.17 | FALSE | 0.323290714 | 1 |
| 256843 | 1 | 0 | 1 | 1 | 0 | 1 | 2 | 1 | 0 | 37.2 | 0 | 37.2 | FALSE | 0.304236278 | 1 |
| 257551 | 1 | 0 | 1 | 1 | 0 | 1 | 2 | 1 | 0 | 31.07 | 0 | 31.07 | FALSE | 0.304236278 | 1 |
| 258037 | 2 | 1 | 1 | 1 | 0 | 1 | 2 | 2 | 0 | 70 | 0 | 70 | FALSE | 0.450336804 | 1 |
| 259932 | 1 | 0 | 1 | 1 | 0 | 1 | 2 | 2 | 1 | 1.13 | 0 | 22.93 | FALSE | 0.31893044 | 1 |
| 260277 | 1 | 0 | 1 | 1 | 0 | 1 | 2 | 2 | 1 | 31.87 | 0 | 40.03 | FALSE | 0.31893044 | 1 |
| 265993 | 1 | 0 | 1 | 1 | 1 | 1 | 1 | 2 | 0 | 28.63 | 0 | 28.63 | TRUE | 0.27859775 | 1 |
| 268397 | 1 | 1 | 1 | 1 | 0 | 0 | 2 | 2 | 1 | 4.73 | 0 | 46.73 | FALSE | 0.23604911 | 1 |
| 272431 | 1 | 0 | 1 | 1 | 0 | 1 | 1 | 2 | 0 | 3.4 | 0 | 3.4 | TRUE | 0.31893044 | 1 |
| 275571 | 1 | 0 | 1 | 1 | 1 | 0 | 2 | 2 | 1 | 5.83 | 0 | 8.8 | FALSE | 0.282635443 | 1 |
| 277691 | 2 | 0 | 1 | 1 | 1 | 0 | 2 | 1 | 0 | 1.13 | 0 | 1.13 | FALSE | 0.498803737 | 1 |
| 277952 | 1 | 0 | 1 | 1 | 0 | 1 | 2 | 2 | 0 | 61.63 | 0 | 61.63 | FALSE | 0.31893044 | 1 |
| 278119 | 1 | 0 | 1 | 1 | 0 | 1 | 1 | 2 | 0 | 36.13 | 0 | 36.13 | TRUE | 0.31893044 | 1 |
| 283001 | 1 | 1 | 1 | 1 | 0 | 1 | 2 | 2 | 1 | 1.43 | 0 | 1.43 | FALSE | 0.23246128 | 1 |
| 283367 | 1 | 1 | 1 | 1 | 0 | 1 | 2 | 2 | 1 | 29.13 | 0 | 49.17 | FALSE | 0.23246128 | 1 |
| 284916 | 1 | 1 | 1 | 2 | 0 | 1 | 1 | 1 | 1 | 29.83 | 0 | 67.17 | TRUE | 0.127921408 | 1 |
| 285812 | 1 | 0 | 1 | 1 | 0 | 1 | 2 | 2 | 1 | 6.57 | 0 | 41.47 | FALSE | 0.31893044 | 1 |
| 287918 | 1 | 1 | 1 | 1 | 0 | 1 | 1 | 2 | 1 | 45.6 | 0 | 50.37 | TRUE | 0.23246128 | 1 |
| 289707 | 2 | 0 | 0 | 1 | 1 | 1 | 1 | 2 | 0 | 12.23 | 0 | 12.23 | TRUE | 0.455926539 | 1 |
| 290718 | 1 | 1 | 1 | 1 | 0 | 0 | 2 | 2 | 1 | 8.63 | 0 | 14.3 | FALSE | 0.23604911 | 1 |
| 291969 | 1 | 1 | 1 | 1 | 0 | 0 | 2 | 1 | 0 | 21 | 0 | 21 | FALSE | 0.223918099 | 1 |
| 293053 | 1 | 1 | 1 | 1 | 1 | 0 | 2 | 2 | 1 | 2.03 | 1 | 17.97 | FALSE | 0.203072588 | 1 |
| 297958 | 1 | 0 | 1 | 1 | 1 | 1 | 2 | 2 | 1 | 8.23 | 0 | 56.43 | FALSE | 0.27859775 | 1 |
| 301984 | 1 | 0 | 1 | 1 | 0 | 1 | 2 | 2 | 0 | 25.43 | 0 | 25.43 | FALSE | 0.31893044 | 1 |
| 304543 | 1 | 1 | 1 | 2 | 1 | 1 | 2 | 2 | 1 | 10.23 | 1 | 26.57 | FALSE | 0.114691945 | 1 |
| 304682 | 1 | 0 | 1 | 1 | 0 | 1 | 1 | 2 | 1 | 15.7 | 0 | 16.2 | TRUE | 0.31893044 | 1 |
| 305401 | 2 | 0 | 1 | 1 | 0 | 1 | 1 | 2 | 1 | 4.4 | 1 | 31.07 | TRUE | 0.558842041 | 1 |
| 306045 | 1 | 0 | 1 | 1 | 1 | 1 | 1 | 2 | 0 | 31.73 | 0 | 31.73 | TRUE | 0.27859775 | 1 |
| 306075 | 1 | 1 | 1 | 1 | 0 | 0 | 1 | 2 | 1 | 1.33 | 1 | 11.17 | TRUE | 0.23604911 | 1 |
| 306971 | 1 | 0 | 1 | 1 | 0 | 1 | 2 | 2 | 1 | 22.83 | 0 | 58.4 | FALSE | 0.31893044 | 1 |
| 310343 | 1 | 0 | 1 | 1 | 1 | 0 | 2 | 2 | 1 | 12.13 | 0 | 49.87 | FALSE | 0.282635443 | 1 |
| 312515 | 1 | 1 | 2 | 1 | 0 | 1 | 2 | 2 | 1 | 45 | 0 | 51.23 | FALSE | 0.274086864 | 1 |
| 314965 | 1 | 0 | 1 | 1 | 0 | 1 | 2 | 1 | 0 | 23.53 | 0 | 23.53 | FALSE | 0.304236278 | 1 |
| 315536 | 1 | 0 | 1 | 1 | 0 | 1 | 2 | 2 | 1 | 17.93 | 0 | 39.23 | FALSE | 0.31893044 | 1 |
| 321094 | 2 | 0 | 1 | 1 | 0 | 1 | 2 | 1 | 0 | 27.63 | 0 | 27.63 | FALSE | 0.541889031 | 1 |
| 321740 | 1 | 0 | 1 | 1 | 0 | 1 | 2 | 2 | 1 | 4 | 0 | 50.8 | FALSE | 0.31893044 | 1 |
| 322953 | 1 | 1 | 1 | 1 | 0 | 0 | 2 | 2 | 1 | 1 | 1 | 1 | FALSE | 0.23604911 | 1 |
| 324981 | 1 | 0 | 1 | 1 | 1 | 1 | 1 | 2 | 1 | 14.27 | 0 | 37.97 | TRUE | 0.27859775 | 1 |
| 329917 | 1 | 0 | 1 | 1 | 0 | 1 | 2 | 2 | 0 | 1.27 | 0 | 1.27 | FALSE | 0.31893044 | 1 |
| 333478 | 1 | 1 | 1 | 1 | 0 | 1 | 2 | 2 | 1 | 1.07 | 0 | 20.57 | FALSE | 0.23246128 | 1 |
| 334580 | 1 | 0 | 1 | 1 | 0 | 1 | 2 | 2 | 1 | 3.17 | 0 | 39.23 | FALSE | 0.31893044 | 1 |
| 335144 | 2 | 0 | 1 | 1 | 1 | 1 | 1 | 1 | 1 | 13.5 | 0 | 13.5 | TRUE | 0.493803647 | 1 |
| 335955 | 2 | 0 | 1 | 1 | 1 | 1 | 2 | 2 | 0 | 5.8 | 0 | 5.8 | FALSE | 0.510930106 | 1 |
| 337559 | 1 | 0 | 1 | 1 | 0 | 1 | 1 | 2 | 0 | 22.07 | 0 | 22.1 | TRUE | 0.31893044 | 1 |
| 345762 | 1 | 0 | 1 | 1 | 0 | 1 | 1 | 2 | 1 | 1.1 | 1 | 7.83 | TRUE | 0.31893044 | 1 |
| 346135 | 1 | 0 | 1 | 2 | 0 | 1 | 2 | 2 | 1 | 3.5 | 0 | 39.03 | FALSE | 0.195419016 | 1 |
| 355892 | 1 | 1 | 1 | 1 | 0 | 0 | 2 | 2 | 0 | 30.07 | 0 | 30.07 | FALSE | 0.23604911 | 1 |
| 357779 | 2 | 1 | 1 | 1 | 0 | 0 | 1 | 2 | 1 | 1.33 | 0 | 16.4 | TRUE | 0.455292634 | 1 |
| 362583 | 1 | 0 | 1 | 1 | 0 | 0 | 2 | 2 | 0 | 15.43 | 0 | 15.43 | FALSE | 0.323290714 | 1 |
| 364705 | 2 | 0 | 1 | 1 | 1 | 0 | 2 | 2 | 1 | 1.1 | 0 | 24.73 | FALSE | 0.515926862 | 1 |
| 368201 | 1 | 1 | 1 | 1 | 0 | 1 | 1 | 2 | 1 | 10.17 | 0 | 10.17 | TRUE | 0.23246128 | 1 |
| 381848 | 1 | 0 | 1 | 1 | 1 | 1 | 2 | 2 | 1 | 11.93 | 0 | 14.3 | FALSE | 0.27859775 | 1 |
| 383646 | 2 | 0 | 1 | 1 | 1 | 1 | 1 | 2 | 0 | 1.37 | 0 | 1.37 | TRUE | 0.510930106 | 1 |
| 394003 | 1 | 1 | 1 | 2 | 0 | 1 | 1 | 2 | 1 | 10.77 | 0 | 20.3 | TRUE | 0.135761465 | 1 |
| 394836 | 1 | 0 | 1 | 1 | 1 | 0 | 1 | 1 | 0 | 23.43 | 0 | 23.43 | TRUE | 0.268953149 | 1 |
| 397389 | 1 | 0 | 0 | 1 | 1 | 0 | 2 | 2 | 0 | 22.23 | 0 | 22.23 | FALSE | 0.240141071 | 1 |
| 400366 | 1 | 0 | 1 | 1 | 0 | 1 | 2 | 2 | 0 | 16.8 | 0 | 16.8 | FALSE | 0.31893044 | 1 |
| 411790 | 1 | 0 | 1 | 1 | 1 | 1 | 2 | 2 | 1 | 8.4 | 0 | 8.4 | FALSE | 0.27859775 | 1 |
| 413755 | 1 | 0 | 1 | 1 | 0 | 1 | 1 | 1 | 0 | 8.6 | 0 | 8.6 | TRUE | 0.304236278 | 1 |
| 414290 | 1 | 0 | 1 | 1 | 0 | 1 | 1 | 2 | 0 | 11.8 | 0 | 11.8 | TRUE | 0.31893044 | 1 |
| 426741 | 1 | 1 | 1 | 1 | 0 | 1 | 1 | 2 | 0 | 11.6 | 0 | 11.6 | TRUE | 0.23246128 | 1 |
| 159756 | 1 | 1 | 2 | 1 | 0 | 1 | 2 | 2 | 0 | 13.43 | 0 | 13.43 | FALSE | 0.274086864 | 1 |
| 208569 | 1 | 0 | 0 | 1 | 1 | 1 | 1 | 2 | 0 | 1.53 | 0 | 1.53 | TRUE | 0.236510301 | 1 |
| 235557 | 1 | 1 | 1 | 1 | 0 | 0 | 1 | 2 | 0 | 1.07 | 1 | 5.33 | TRUE | 0.23604911 | 1 |
| 285429 | 1 | 1 | 1 | 1 | 0 | 1 | 2 | 2 | 1 | 21.9 | 0 | 69.13 | FALSE | 0.23246128 | 1 |
| 300145 | 2 | 0 | 1 | 1 | 0 | 1 | 1 | 2 | 0 | 26.27 | 0 | 26.27 | TRUE | 0.558842041 | 1 |
| 304808 | 1 | 1 | 1 | 1 | 0 | 0 | 1 | 2 | 0 | 61.43 | 0 | 61.43 | TRUE | 0.23604911 | 1 |
| 337762 | 1 | 0 | 1 | 1 | 0 | 1 | 1 | 2 | 0 | 1.07 | 0 | 1.07 | TRUE | 0.31893044 | 1 |
| 381166 | 2 | 0 | 1 | 1 | 1 | 0 | 1 | 2 | 1 | 1.1 | 0 | 27.27 | TRUE | 0.515926862 | 1 |
| 382572 | 2 | 0 | 1 | 1 | 1 | 0 | 2 | 2 | 1 | 1.07 | 0 | 29.67 | FALSE | 0.515926862 | 1 |
